# Supplementary material for: Polymerization of Various Lignins via Immobilized Myceliophthora thermophila Laccase (MtL)
Source: MDPI journal article supplement (doi:10.3390/polym8080280), 2016-08-03

# Supplementary Materials: Polymerization of Various Lignins via Immobilized *Myceliophthora thermophila* Laccase (MtL)

Daniela Huber, Alessandro Pellis, Andreas Daxbacher, Gibson S. Nyanhongo and Georg M. Guebitz

**Table S1.** Fluorescence intensity of MTL-PP polymerized KL and lignosulfonate over 24 h of polymerization. The data are presented in RFU with the corresponding standard deviation of triplicates.

| Time points | Fluorescence intensity [RFU] of LS |                  |                   | Fluorescence intensity [RFU] of KL |                  |                |
|-------------|------------------------------------|------------------|-------------------|------------------------------------|------------------|----------------|
|             | 50 mg<br>MTL-PP                    | 100 mg<br>MTL-PP | No<br>MTL-PP      | 50 mg<br>MTL-PP                    | 100 mg<br>MTL-PP | No<br>MTL-PP   |
| 0 h         | 34,521.5 ± 3639.5                  | 39,564.5 ± 17.7  | 37,392.7 ± 360.0  | 6448.3 ± 497.5                     | 6653.8 ± 40.7    | 6649.8 ± 627.7 |
| 1 h         | 29,353.5 ± 2239.4                  | 26,149.8 ± 29.3  | 44,302.5 ± 215.7  | 4444.5 ± 33.2                      | 4001.0 ± 45.3    | 7116.3 ± 348.4 |
| 3 h         | 25,130.7 ± 6583.6                  | 20,514.3 ± 448.1 | 52,035.7 ± 767.1  | 3020.5 ± 124.5                     | 2498.8 ± 73.8    | 6161.0 ± 80.6  |
| 5 h         | 19,902.6 ± 937.7                   | 14,472.7 ± 344.6 | 43,284.1 ± 3580.0 | 2457.5 ± 119.5                     | 2129.8 ± 129.8   | 5942.3 ± 399.9 |
| 8 h         | 18,947.0 ± 2682.1                  | 10,096.8 ± 631.8 | 38,849.8 ± 1239.1 | 2167.0 ± 93.3                      | 1732.5 ± 47.4    | 5786.8 ± 172.2 |
| 24 h        | 8528.3 ± 484.7                     | 4640.25 ± 544.8  | 43,875.7 ± 93.5   | 1382.0 ± 66.5                      | 1149.4 ± 12.8    | 5301.0 ± 79.2  |

**Table S2.** Phenol content of MTL-PP polymerized lignins from 0 to 24 h polymerization. The data were analyzed in triplicates and the phenol content is presented in mg·L<sup>-1</sup> with the standard deviation.

| Time points | Phenol content [mg·L <sup>-1</sup> ] of LS |                  |              | Phenol content [mg·L <sup>-1</sup> ] of KL |                  |              |
|-------------|--------------------------------------------|------------------|--------------|--------------------------------------------|------------------|--------------|
|             | 50 mg<br>MTL-PP                            | 100 mg<br>MTL-PP | No<br>MTL-PP | 50 mg<br>MTL-PP                            | 100 mg<br>MTL-PP | No<br>MTL-PP |
| 0 h         | 12.6 ± 0.5                                 | 12.7 ± 0.1       | 12.5 ± 0.3   | 38.3 ± 3.1                                 | 37.7 ± 4.8       | 36.1 ± 2.4   |
| 1 h         | 11.7 ± 0.7                                 | 11.9 ± 0.7       | 13.1 ± 0.9   | 38.3 ± 4.2                                 | 41.7 ± 0.6       | 35.6 ± 2.1   |
| 3 h         | 12.6 ± 1.2                                 | 10.7 ± 0.4       | 13.2 ± 0.5   | 37.9 ± 8.1                                 | 36.3 ± 0.1       | 45.6 ± 0.4   |
| 5 h         | 12.5 ± 1.2                                 | 11.1 ± 0.5       | 15.8 ± 0.6   | 37.7 ± 0.9                                 | 38.7 ± 1.4       | 41.1 ± 1.5   |
| 8 h         | 10.5 ± 0.1                                 | 8.3 ± 0.1        | 14.7 ± 1.1   | 33.3 ± 0.2                                 | 29.1 ± 2.9       | 38.5 ± 0.2   |
| 24 h        | 8.7 ± 1.4                                  | 6.1 ± 0.1        | 14.1 ± 0.4   | 29.0 ± 2.3                                 | 26.1 ± 3.7       | 39.9 ± 1.9   |

**Table S3.** Size exclusion chromatography results of LS and KL untreated and treated with 50 and 100 mg Mtl-PP. The weight-average molecular weight  $M_w$  [Da], the number-average molecular weight  $M_n$  [Da] and the polydispersity PD at the beginning of the reaction and after 24 h is presented.

| LS            | $M_w$ [Da] |        | $M_n$ [Da] |      | PD  |      |
|---------------|------------|--------|------------|------|-----|------|
|               | 0 h        | 24 h   | 0 h        | 24 h | 0 h | 24 h |
| No PP         | 1900       | 1900   | 800        | 800  | 2.4 | 2.4  |
| 100 mg PP     | 2300       | 2400   | 1100       | 1100 | 2.1 | 2.2  |
| 50 mg Mtl-PP  | 1900       | 7500   | 800        | 1500 | 2.4 | 4.9  |
| 100 mg Mtl-PP | 1900       | 22,400 | 800        | 1500 | 2.4 | 15.7 |
| KL            | $M_w$ [Da] |        | $M_n$ [Da] |      | PD  |      |
|               | 0 h        | 24 h   | 0 h        | 24 h | 0 h | 24 h |
| No PP         | 1600       | 1600   | 900        | 900  | 1.8 | 1.9  |
| 100 mg PP     | 2400       | 2400   | 1100       | 1100 | 1.7 | 2.2  |
| 50 mg Mtl-PP  | 1500       | 2500   | 800        | 1500 | 2.4 | 5.0  |
| 100 mg Mtl-PP | 1700       | 2300   | 900        | 1000 | 1.9 | 2.4  |

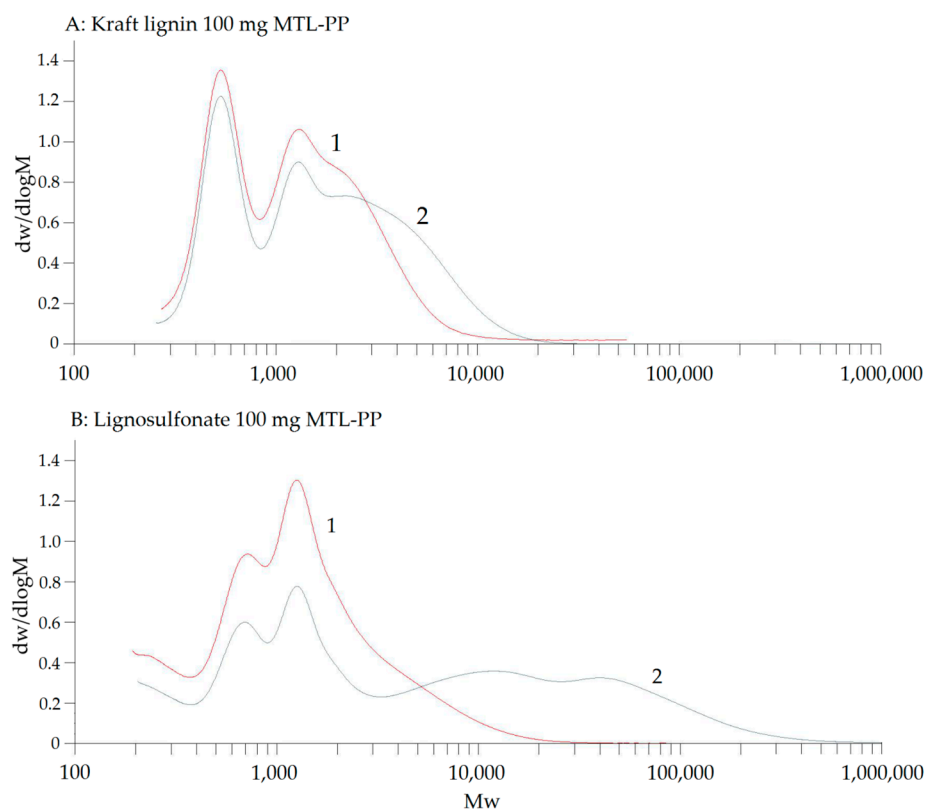

**Figure S1.**  $M_w$  spectra of (A) KL and (B) LS for 100 mg MTL-PP. Curve 1 (red) demonstrates the polymerization without MTL-PP and curve 2 (grey) the polymerization after 24 h of polymerization.

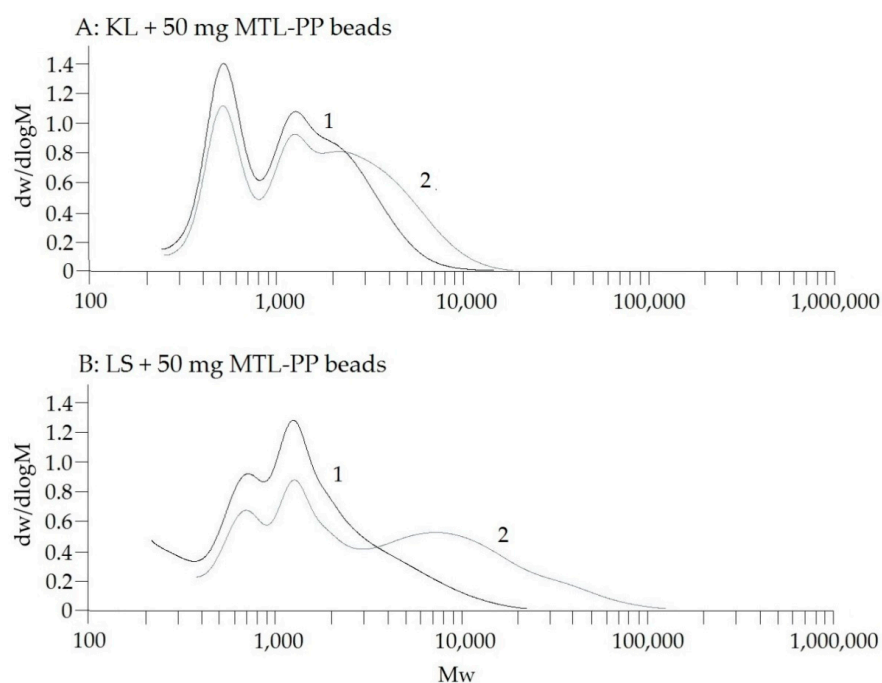

**Figure S2.**  $M_w$  spectra of (A) KL and (B) for 50 mg MTL-PP. LS. Curve 1 (black) demonstrates the polymerization without MTL-PP and curve 2 (grey) the polymerization after 24 h of polymerization.

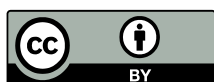

Supplement: s1 [file s1]
